# Supplementary material for: New findings of silica nanoparticles induced ER autophagy in human colon cancer cell
Source: PubMed Central journal article supplement (PMC5307363; doi:10.1038/srep42591), 2017-02-14
Supplement: srep42591-s1.pdf [file srep42591-s1.pdf]

# New findings of silica nanoparticle induced ER autophagy in human colon cancer cell

Fujing Wei <sup>a,1</sup>, Yimin Wang <sup>a,1</sup>, Zewei Luo <sup>a</sup>, Yu Li <sup>a</sup>, Yixiang Duan <sup>a,\*</sup>

<sup>a</sup> Research Center of Analytical Instrumentation, Key Laboratory of Bio-resource and Eco-environment, Ministry of Education, College of Life Sciences, Sichuan

University, Chengdu 610065, PR China. <sup>1</sup> These authors contributed equally to this

work. \* Correspondence and requests for materials should be addressed to Yixiang

Duan (E-mail address: yduan@scu.edu.cn).

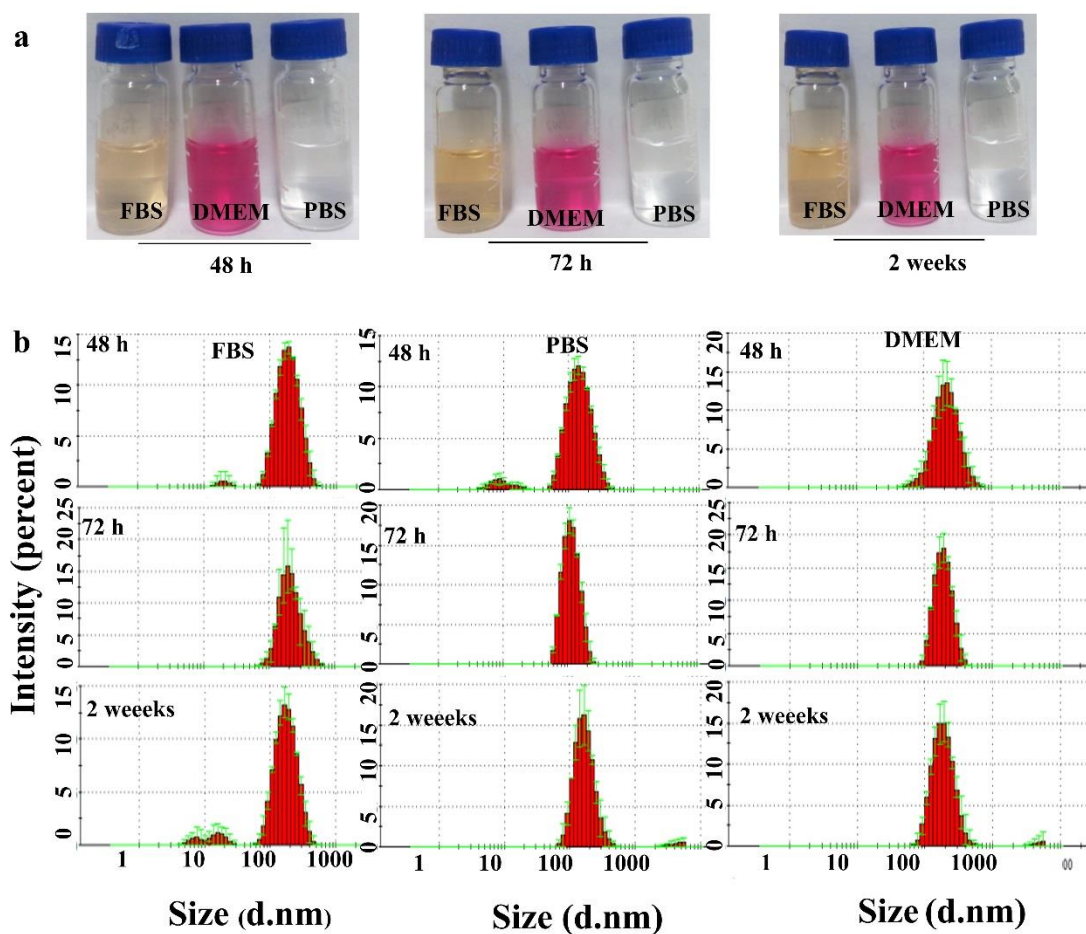

**Supplementary Figure 1. Characterization of SNPs.** (a) The stability of SNPs dissolved in FBS, DMEM, and PBS after 48 h, 72 h, and 2 weeks, respectively. (b)

DLS was used to evaluate the stability of SNPs in FBS, DMEM, and PBS at 48 h, 72 h, and 2 weeks, respectively.

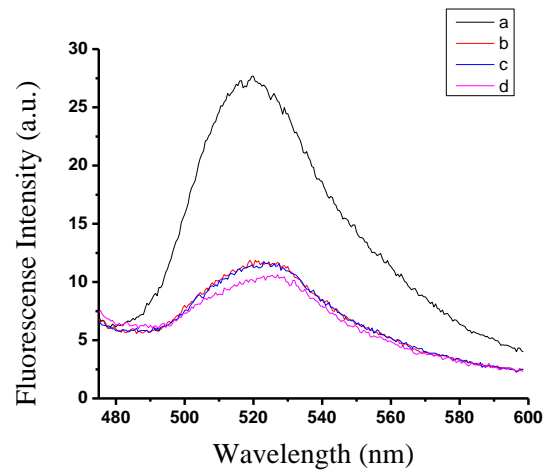

**Supplementary Figure 2. The supernatant fluorescence spectra of SNPs.** The supernatant fluorescence gets weaker and weaker with the washing times increasing from 1 to 4 (a-d).

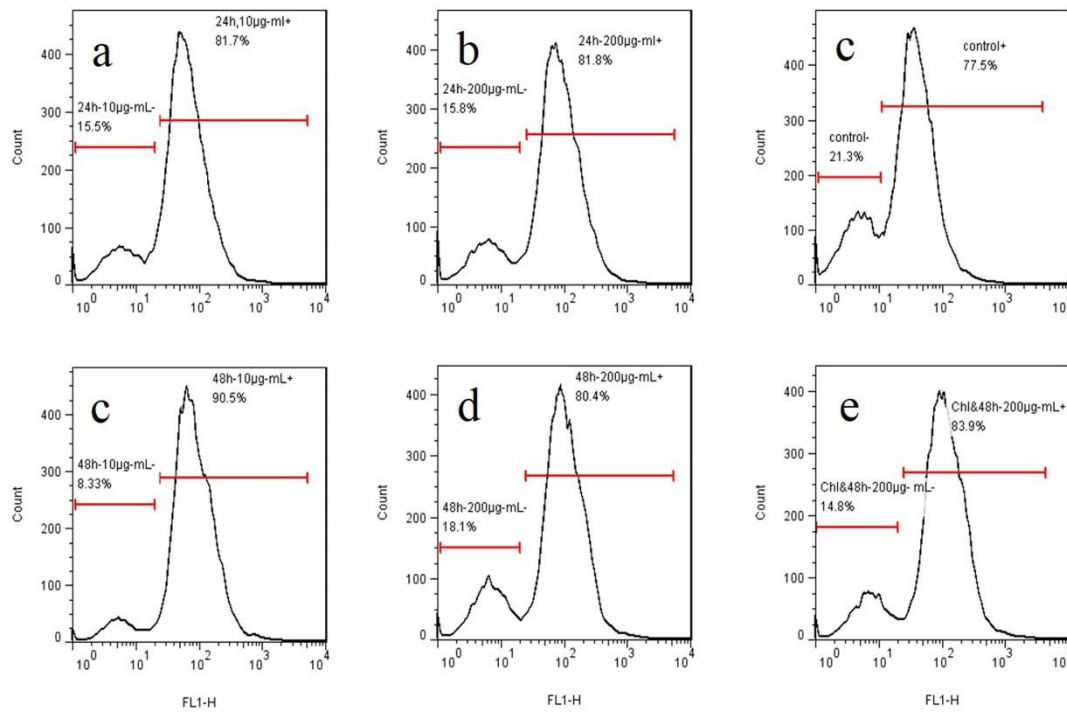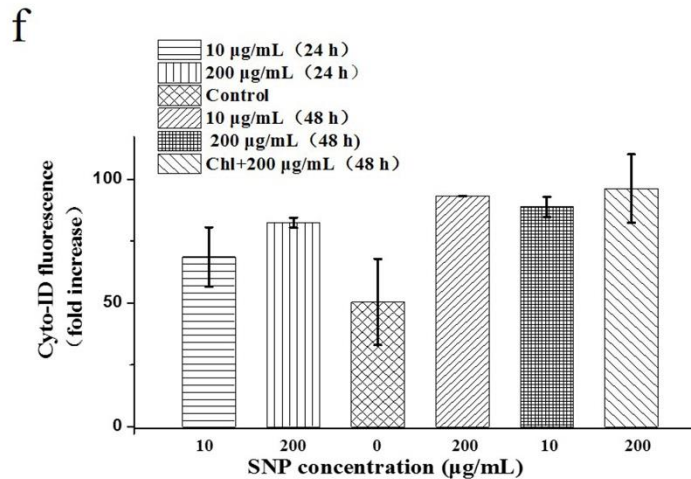

**Supplementary Figure 3. Flow cytometry evaluated autophagy induced by SNPs.**

HCT-116 cells were treated with 10  $\mu$ g/mL SNPs for 24h (a), 200  $\mu$ g/mL for 24h (b), as a control, without any treatment (c), 10  $\mu$ g/mL SNPs for 48h (d), 200  $\mu$ g/mL SNPs for 48h (e), 12.5  $\mu$ M Chloroquine for 1 h, then treated with 200  $\mu$ g/mL SNPs for 48h (f). Flow cytometry results were analyzed by FlowJo (g), and all the groups were performed under the same condition.

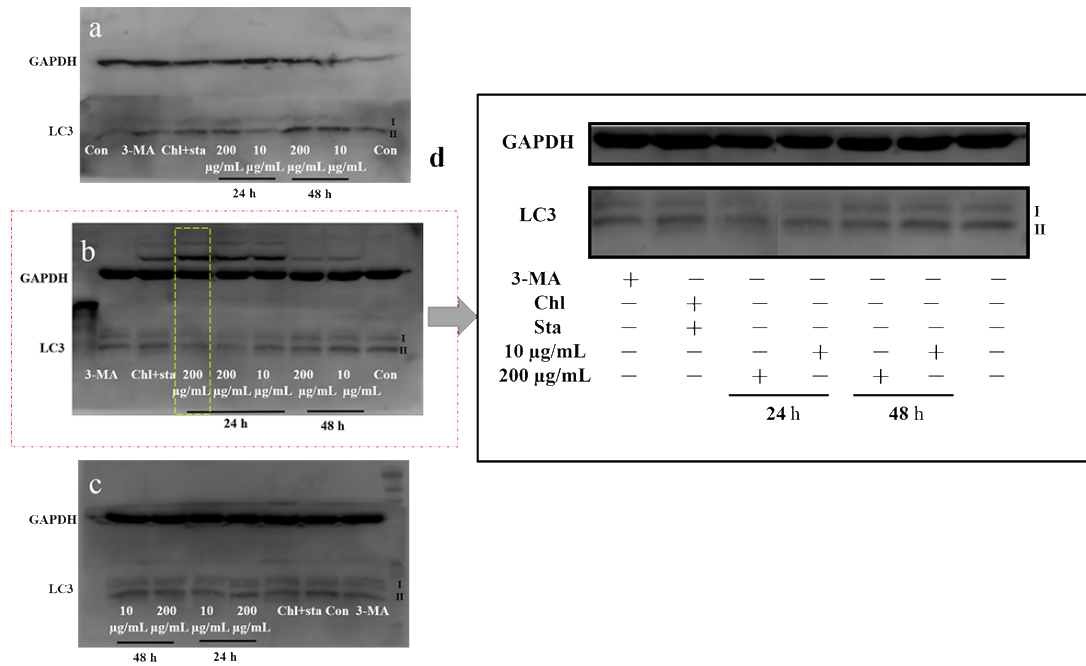

**Supplementary Figure 4. SNPs increase the expression level of LC3.** All the blotting bands were obtained from the same experimental condition. d is cropped from b.

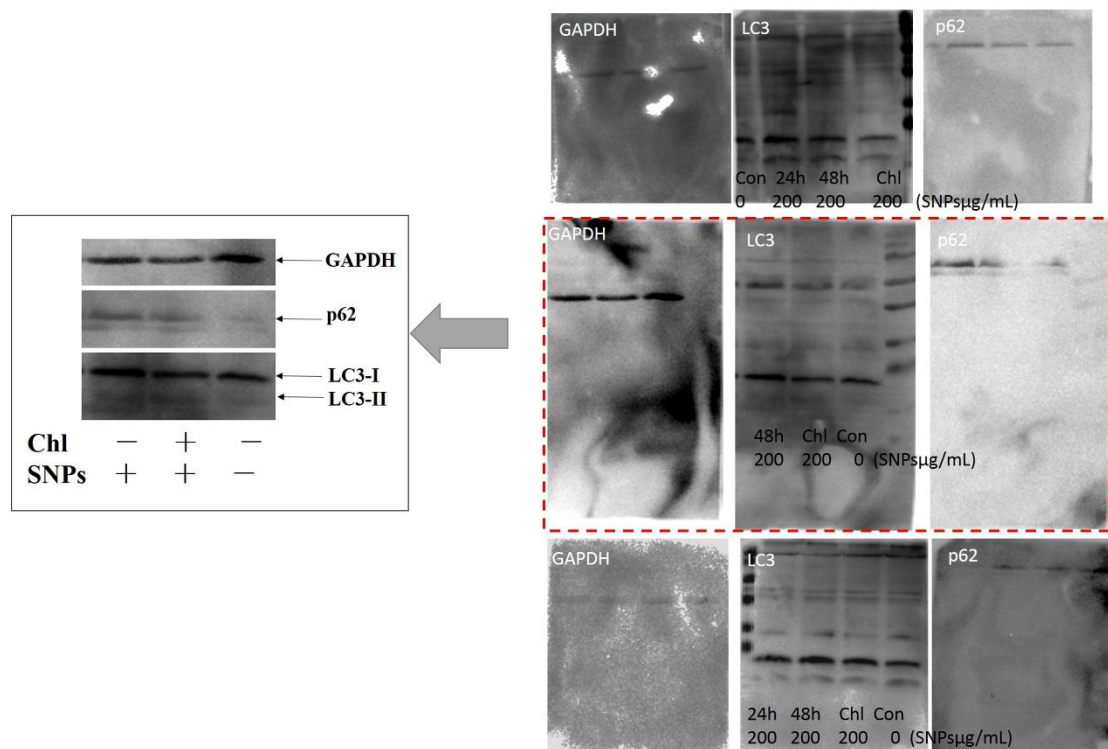

**Supplementary Figure 5. SNPs induce cell autophagy.** All the blotting bands were

obtained under the same experimental condition.
